# Supplementary material
Source: Research Square preprint supplement (doi:10.21203/rs.3.rs-9246014/v1)
Supplement: Supplementary file 1 [file f37fe72c587e14d4d8773922.docx]

| **model** | **TS** | **p** |
| --- | --- | --- |
| Pancreatitis | 0,045946 | 0,481677 |
| Amylase elevation | 0,09476 | 0,462253 |
| Amylase concentration | -0,00737 | 0,502939 |

**Supplementary materials**

**Table 1.**
